# Supplementary material for: Pyrazolo[4,3-e]tetrazolo[1,5-b][1,2,4]triazine Sulfonamides as Novel Potential Anticancer Agents: Apoptosis, Oxidative Stress, and Cell Cycle Analysis
Source: MDPI journal article supplement (doi:10.3390/ijms24108504), 2023-05-09
Supplement: s1 [file s1]

**Table S1.** Cytotoxic properties of **MM129**, **MM130**, and **MM131** presented as IC<sub>50</sub>. Mean values and 95% confidence intervals (parentheses) are given in  $\mu$ M [1].

| Cell type | <b>MM129</b>     | <b>MM130</b>     | <b>MM131</b>     |
|-----------|------------------|------------------|------------------|
| PBMCs     | 1.11 (0.98–1.26) | 0.77 (0.71–0.84) | 0.62 (0.52–0.72) |
| Hs27      | 1.15 (0.95–1.37) | 0.81 (0.64–0.99) | 0.62 (0.43–0.82) |
| HeLa      | 0.9 (0.73–1.06)  | 0.59 (0.51–0.67) | 0.41 (0.28–0.54) |
| HCT 116   | 0.6 (0.58–0.62)  | 0.44 (0.43–0.45) | 0.39 (0.37–0.41) |
| PC-3      | 0.36 (0.32–0.4)  | 0.22 (0.18–0.28) | 0.17 (0.16–0.17) |
| BxPC-3    | 0.26 (0.2–0.32)  | 0.17 (0.13–0.21) | 0.13 (0.11–0.15) |

### 1. Flow Cytometry Assessment of Annexin V Binding

Figures S1-S12 show the exemplary flow cytometry (Annexin V-FITC/PI assay) dot-plots for depicting apoptotic and necrotic changes in examined cancer cell lines (Hela, HCT 116, PC-3, and BxPC-3) exposed to **MM129**, **MM130**, and **MM131** in concentrations of  $\frac{1}{2}$  IC<sub>50</sub>, IC<sub>50</sub>, and 2×IC<sub>50</sub> for 24-h, 48-h, and 72-h. Q1 (upper left quadrant) – necrotic cells (Annexin V-, PI+); Q2 (upper right quadrant) – late apoptotic cells (Annexin V+, PI+); Q3 (lower right quadrant) – early apoptotic cells (Annexin V+, PI-); Q4 (lower left quadrant) – live cells (Annexin V-, PI-).

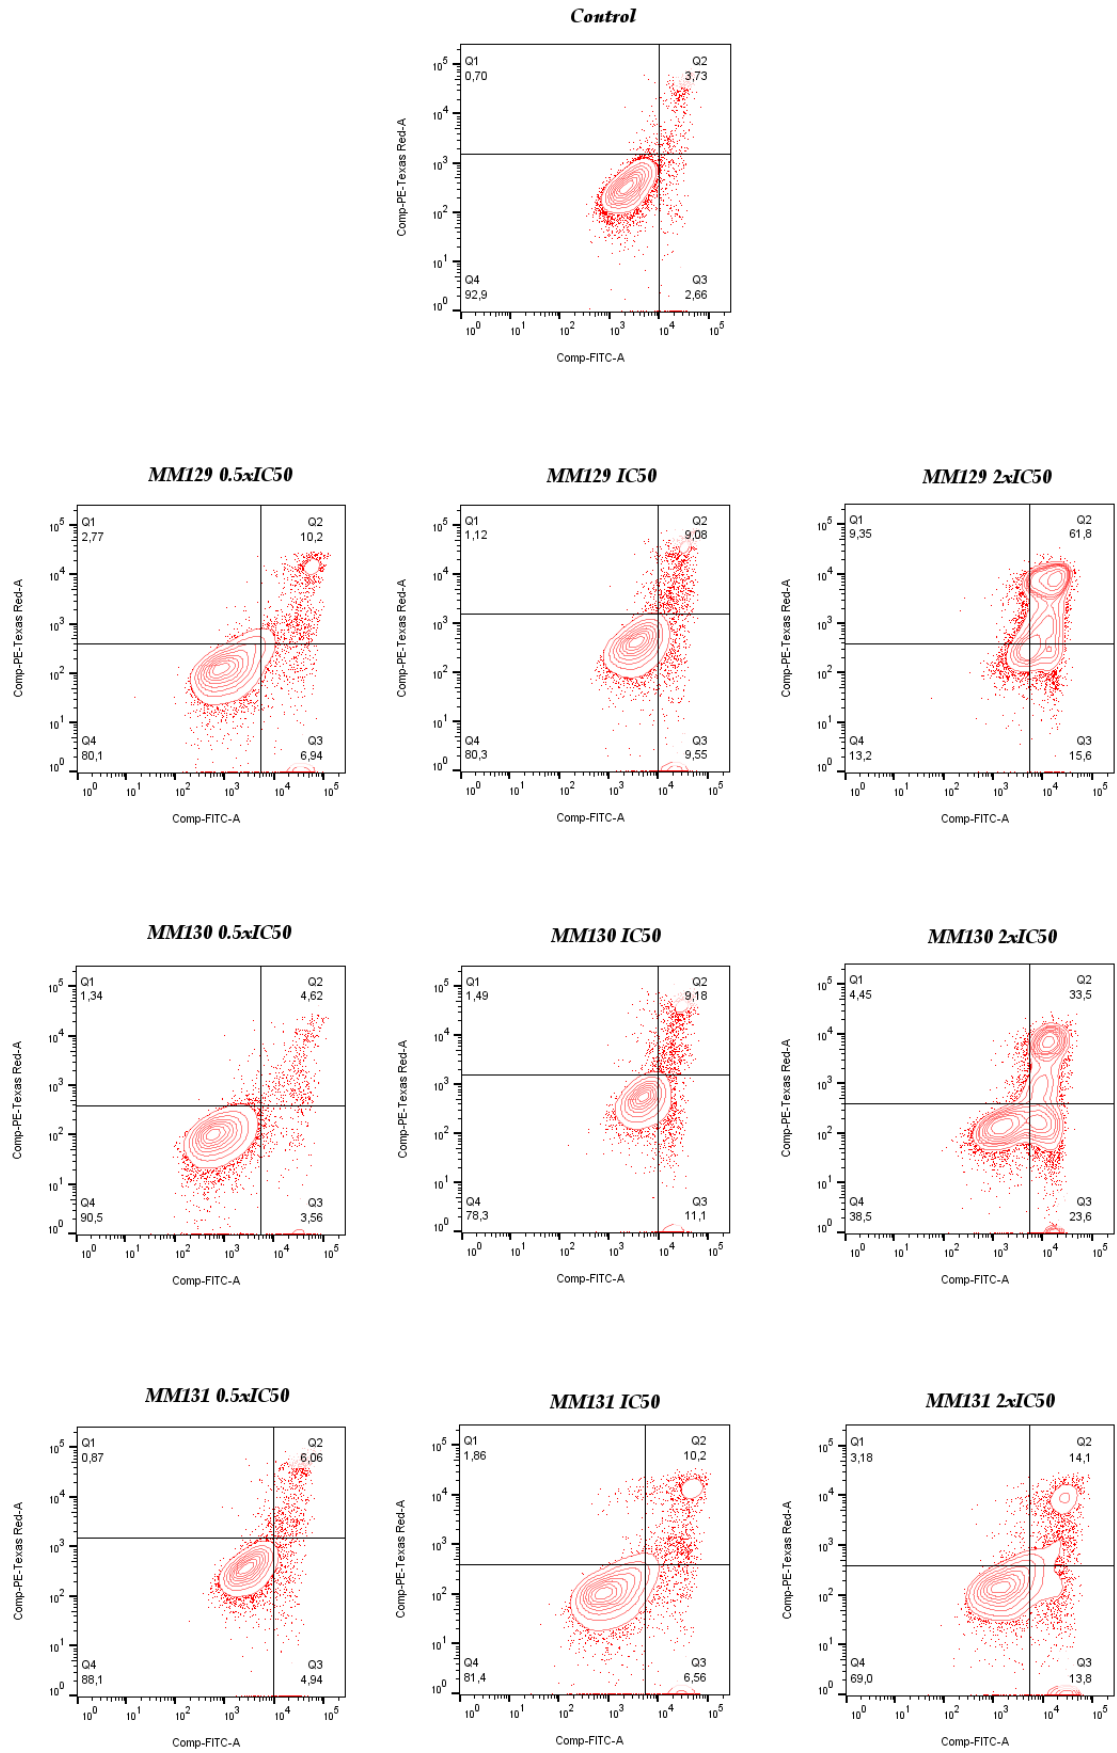

**Figure S1.** Hela cells after 24-h of exposure to MM-compounds.

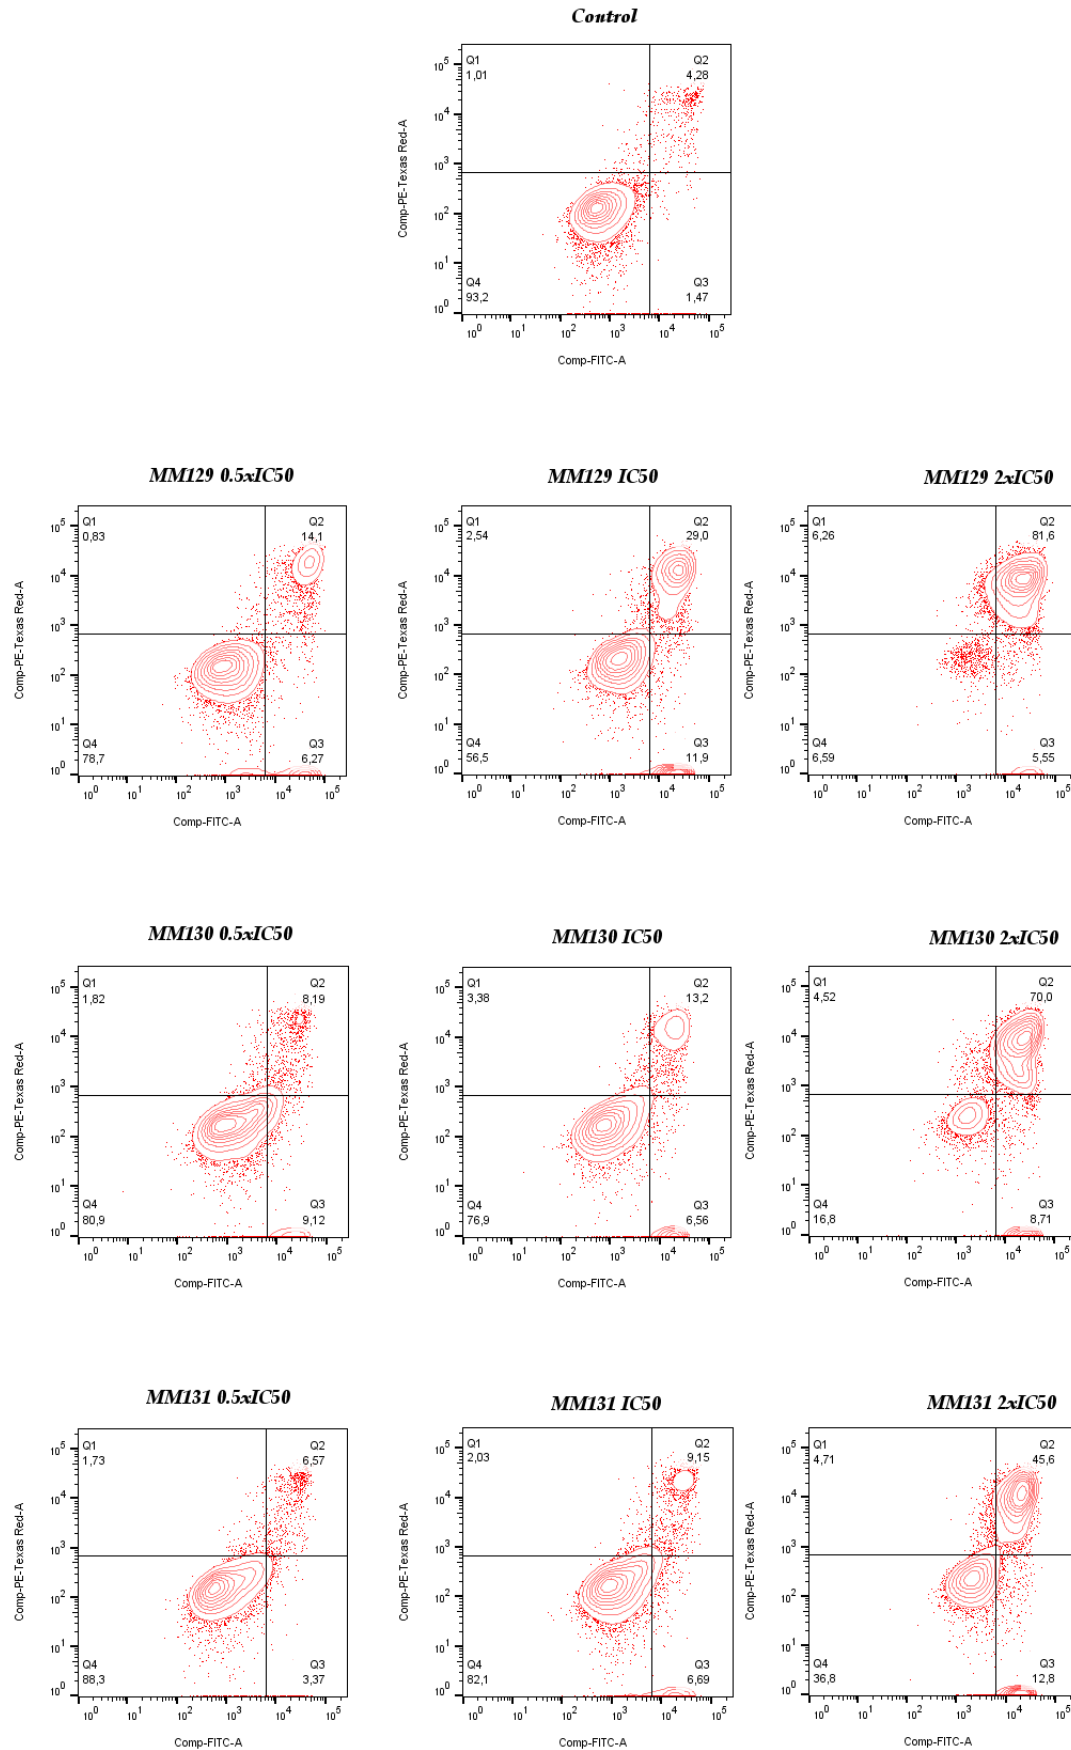

**Figure S2.** Hela cells after 48-h of exposure to MM-compounds.

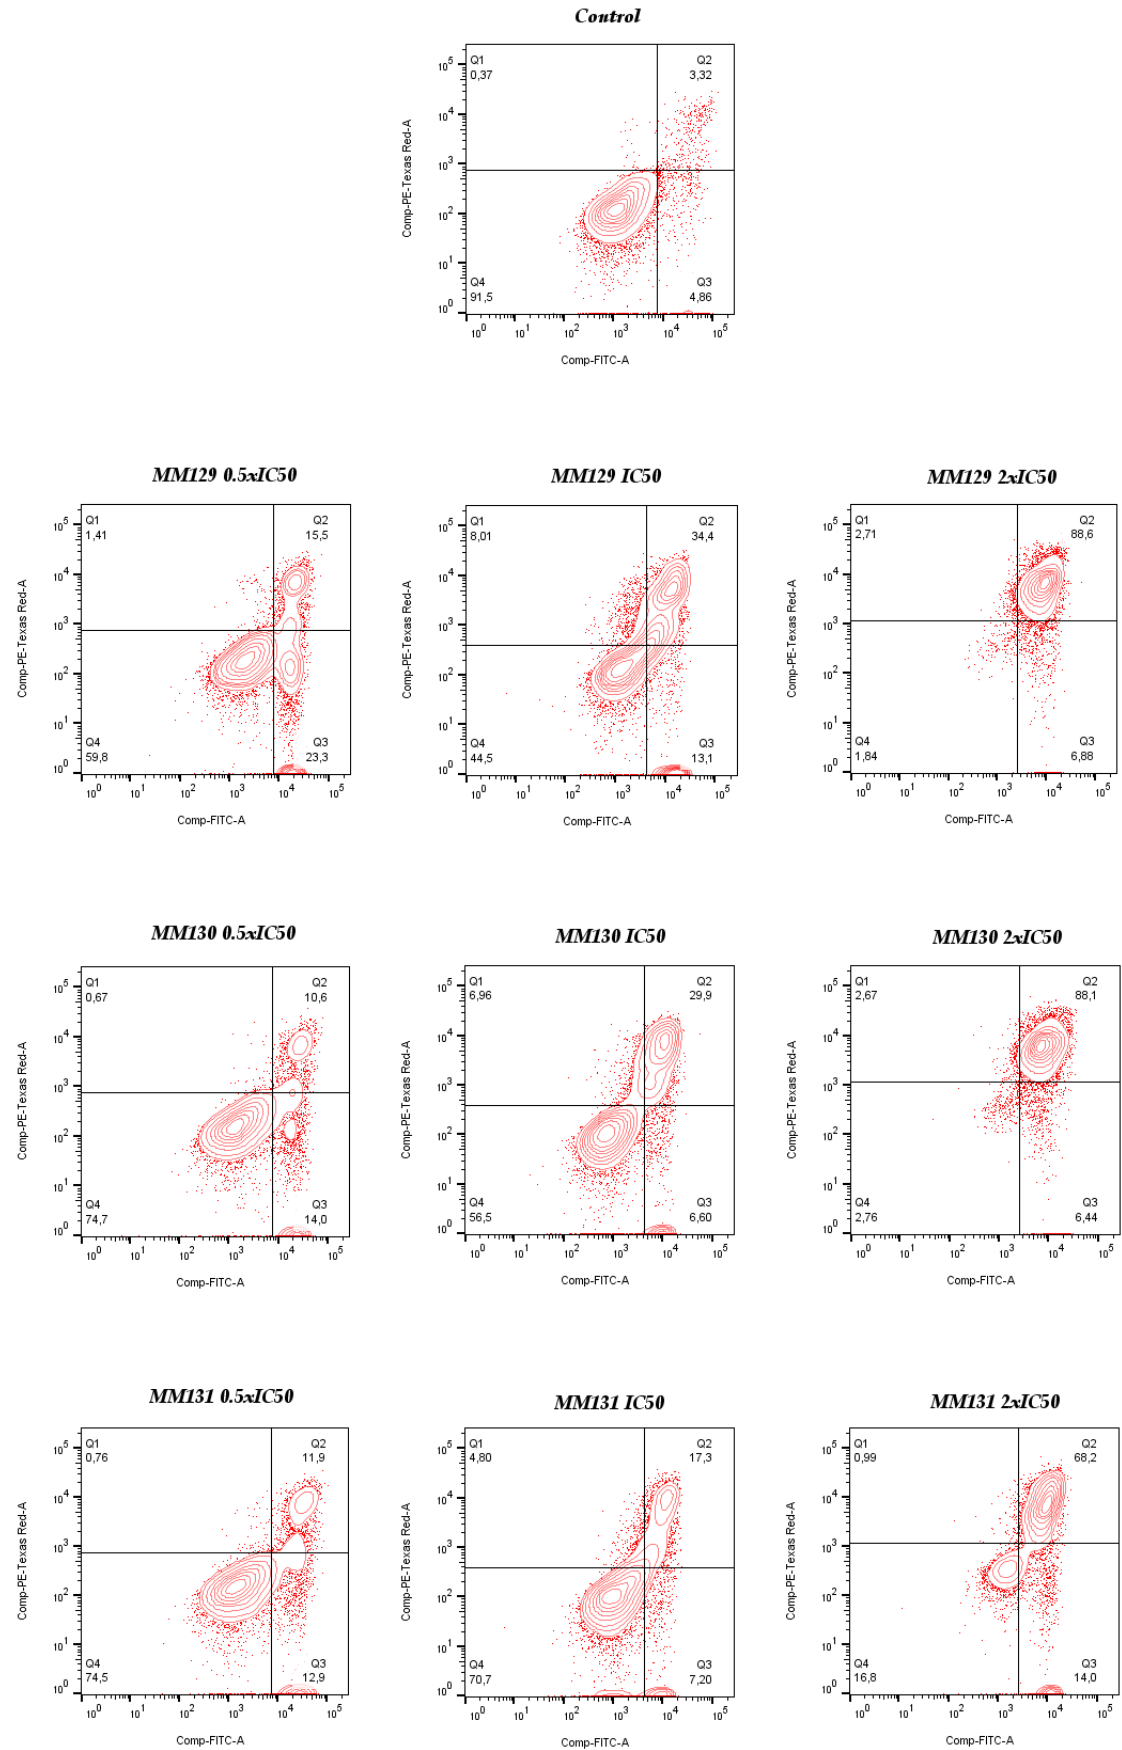

**Figure S3.** Hela cells after 72-h of exposure to MM-compounds.

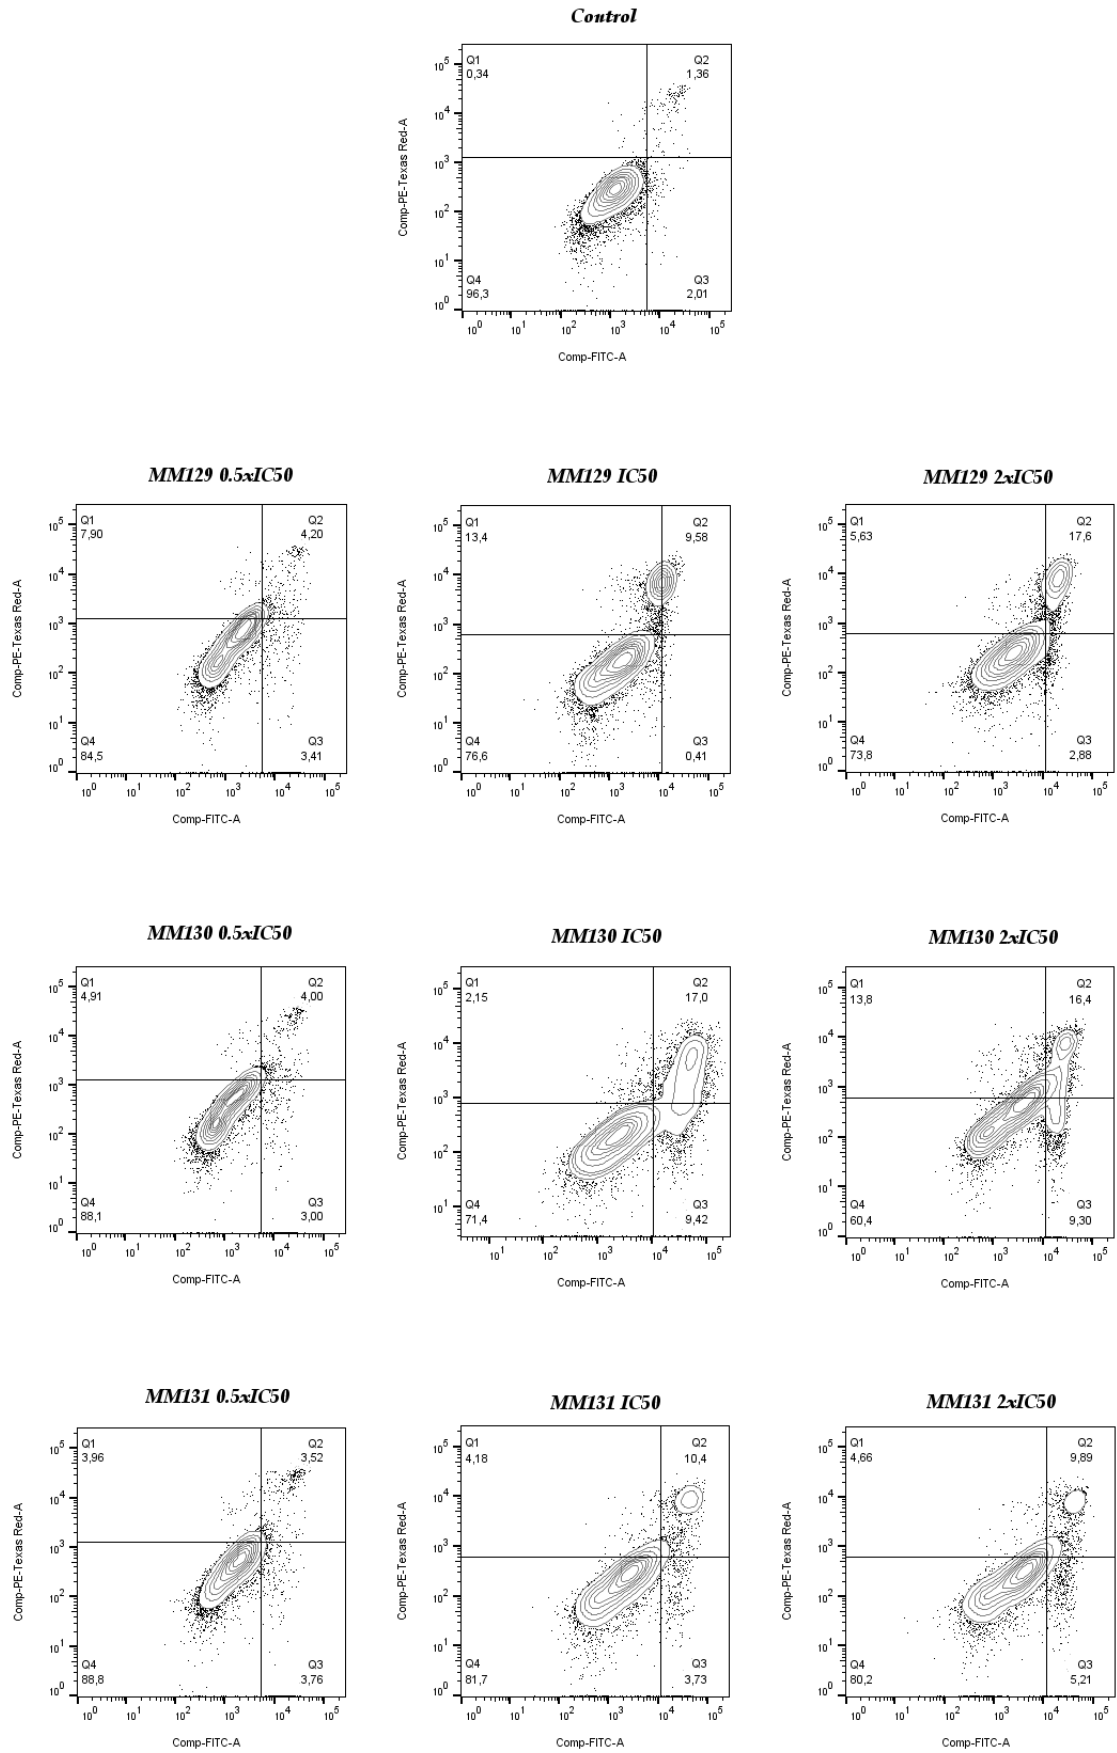

**Figure S4.** HCT 116 cells after 24-h of exposure to MM-compounds.

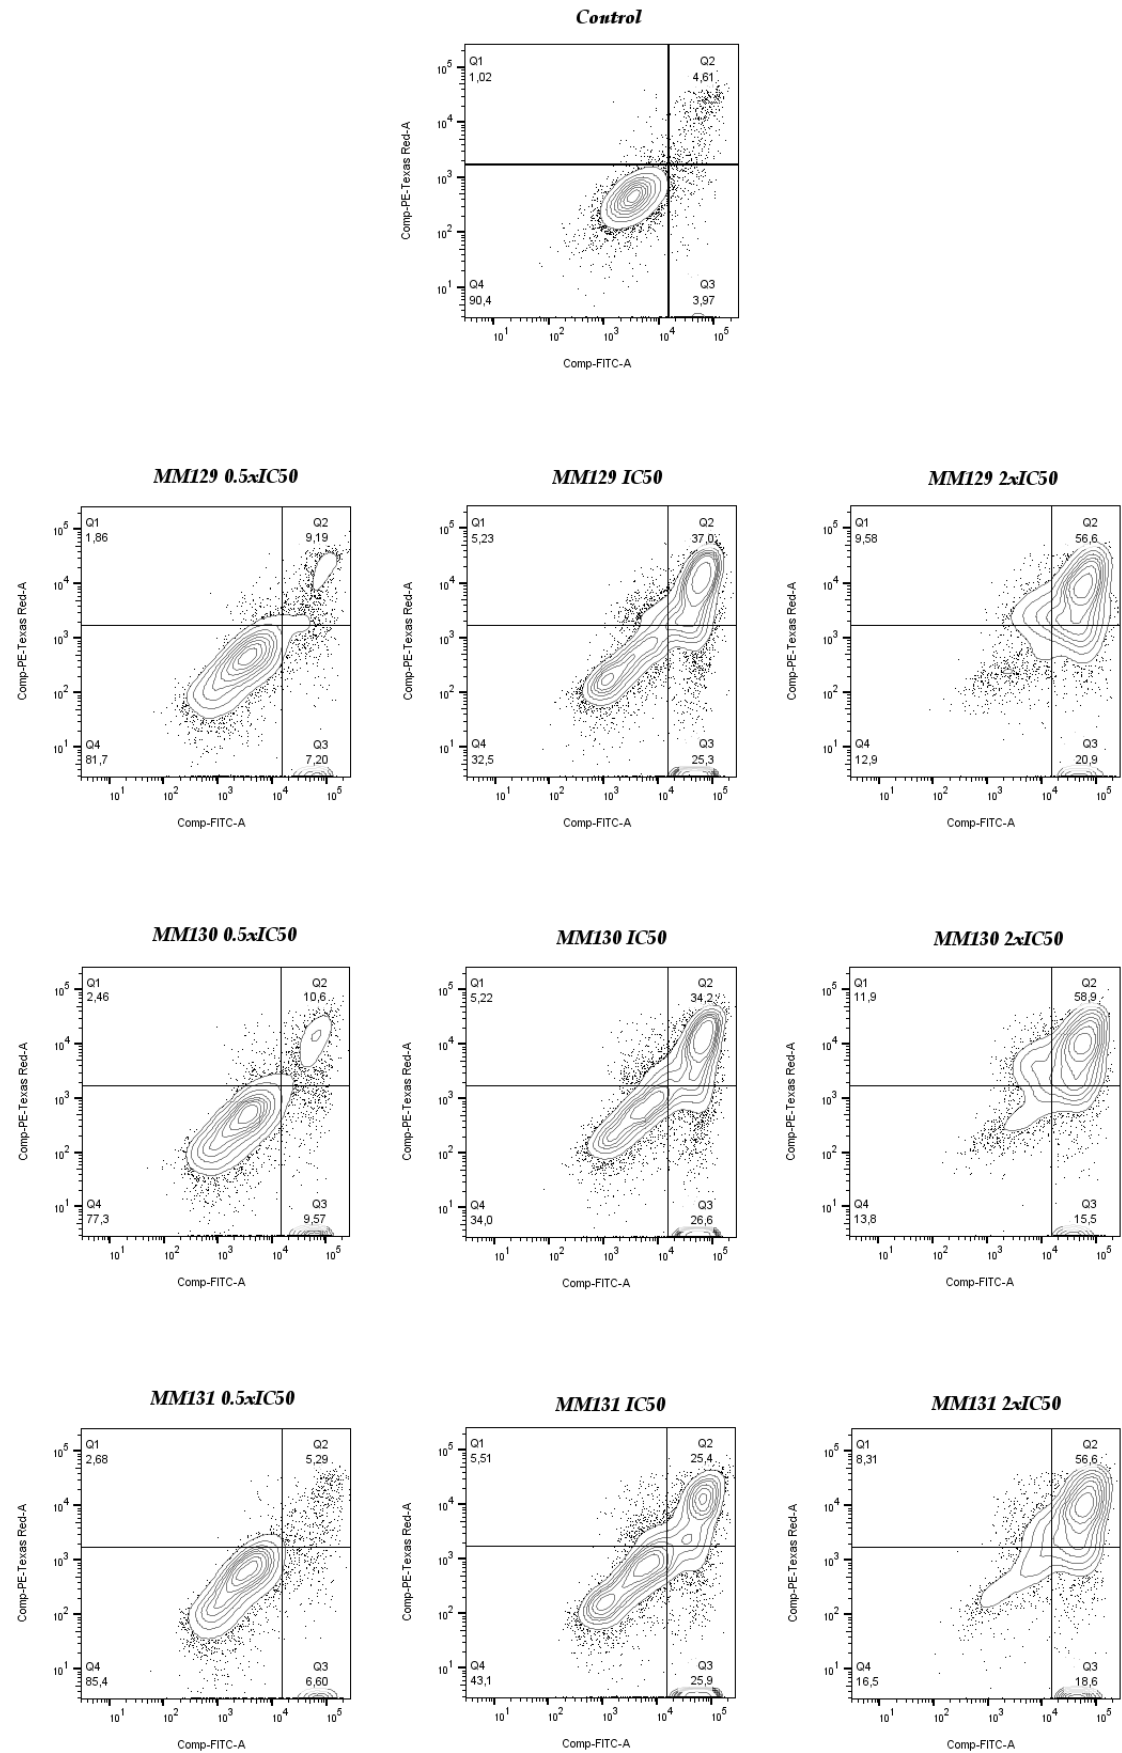

**Figure S5.** HCT 116 cells after 48-h of exposure to MM-compounds.

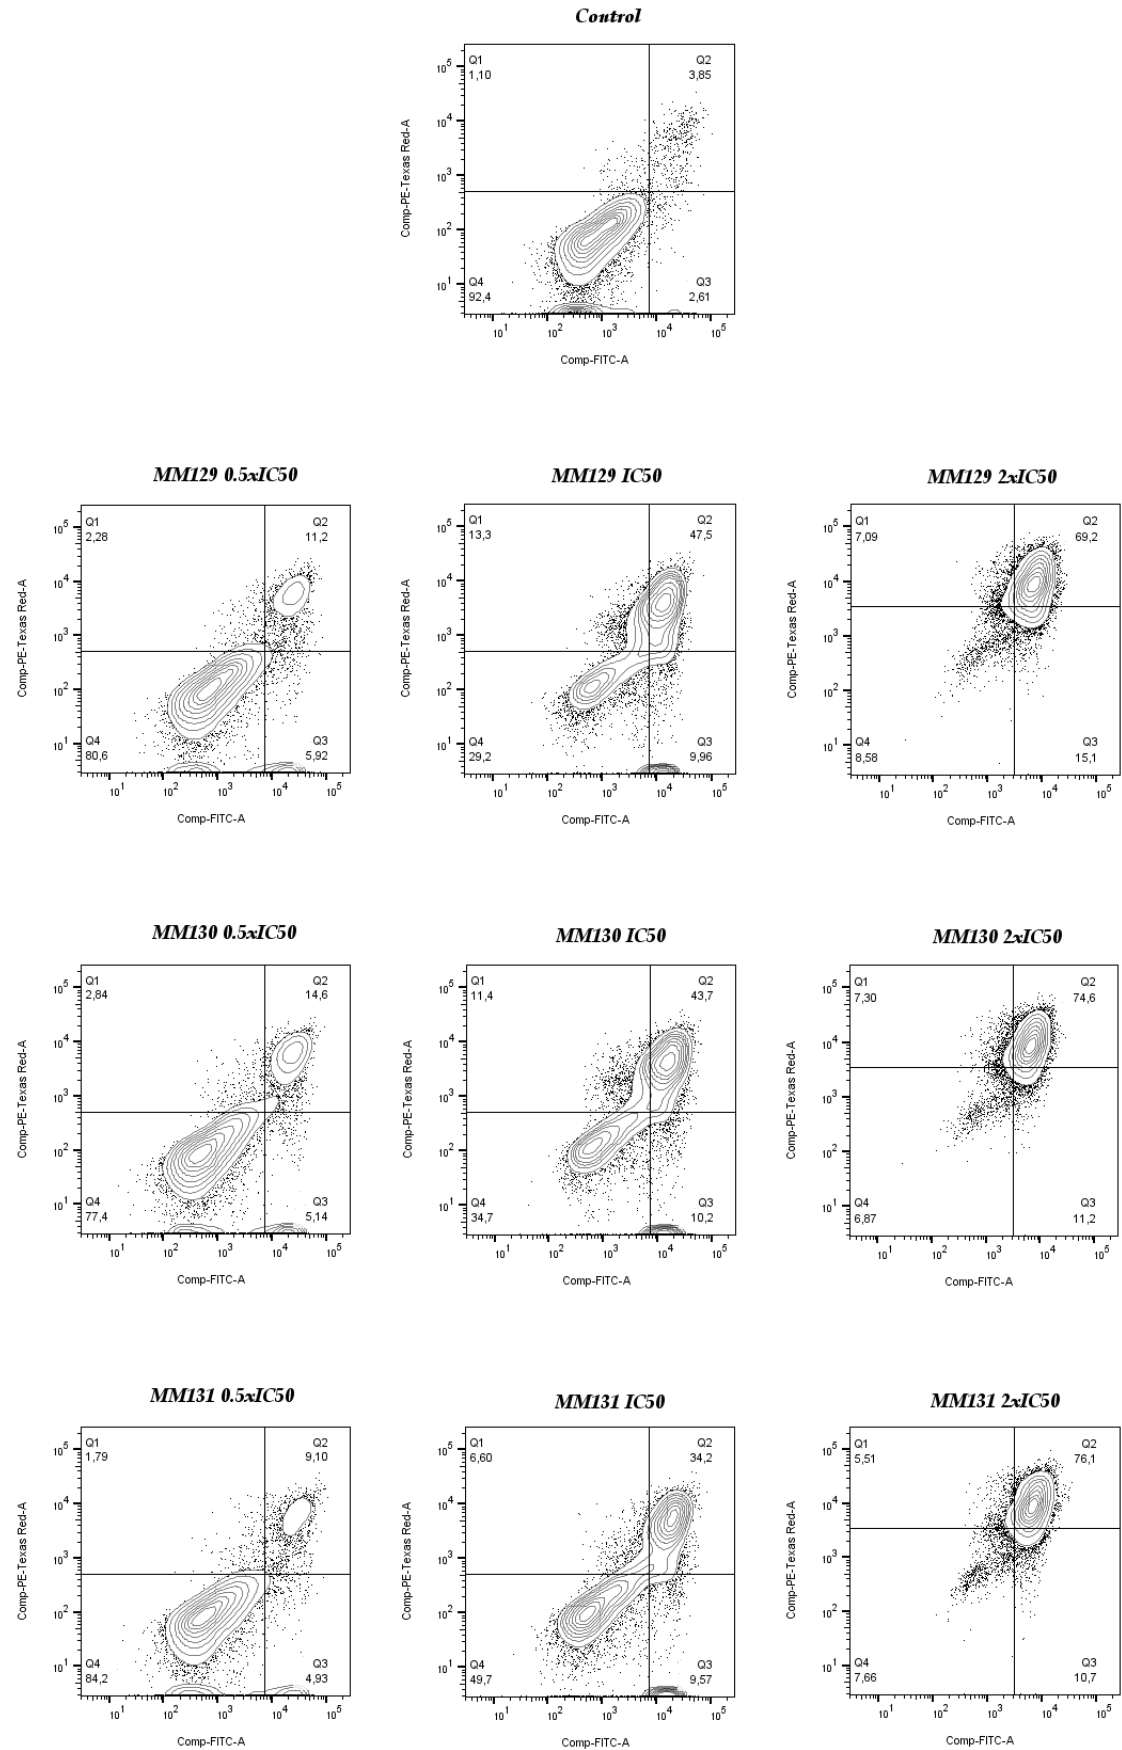

**Figure S6.** HCT 116 cells after 72-h of exposure to MM-compounds.

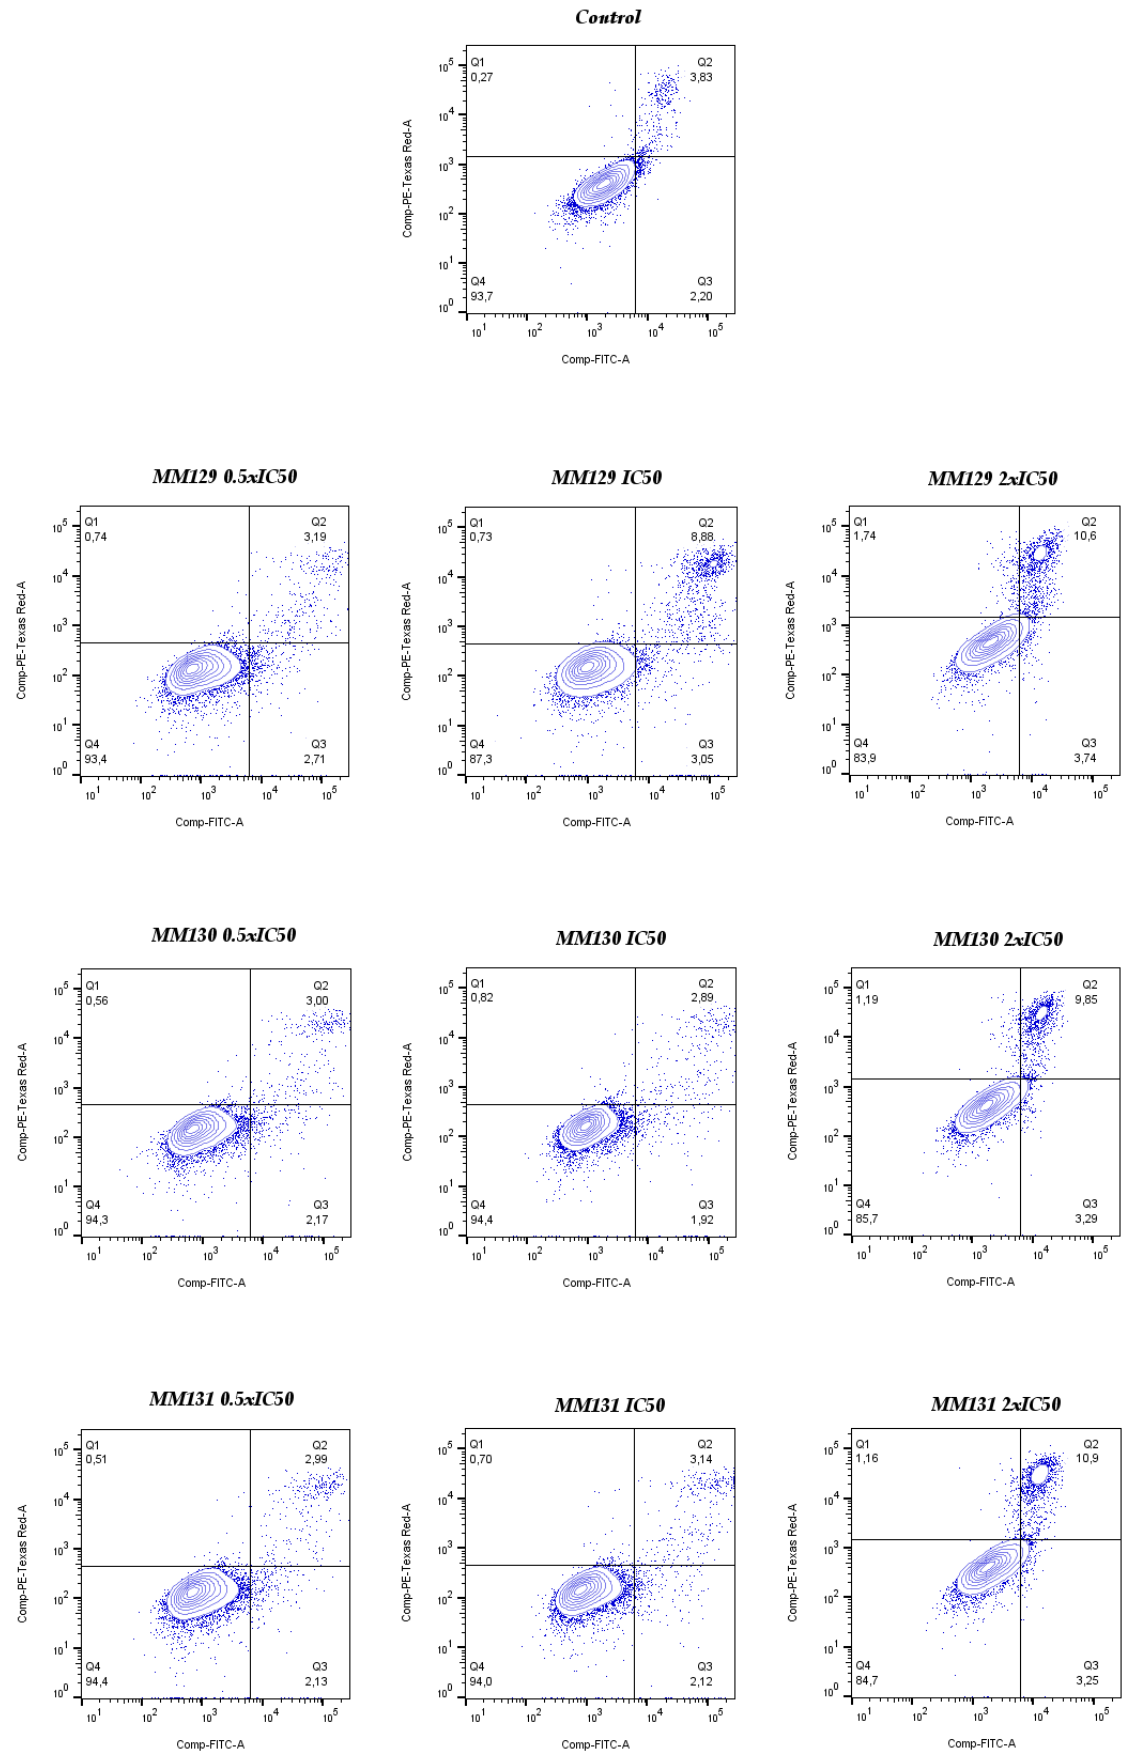

**Figure S7.** PC-3 cells after 24-h of exposure to MM-compounds.



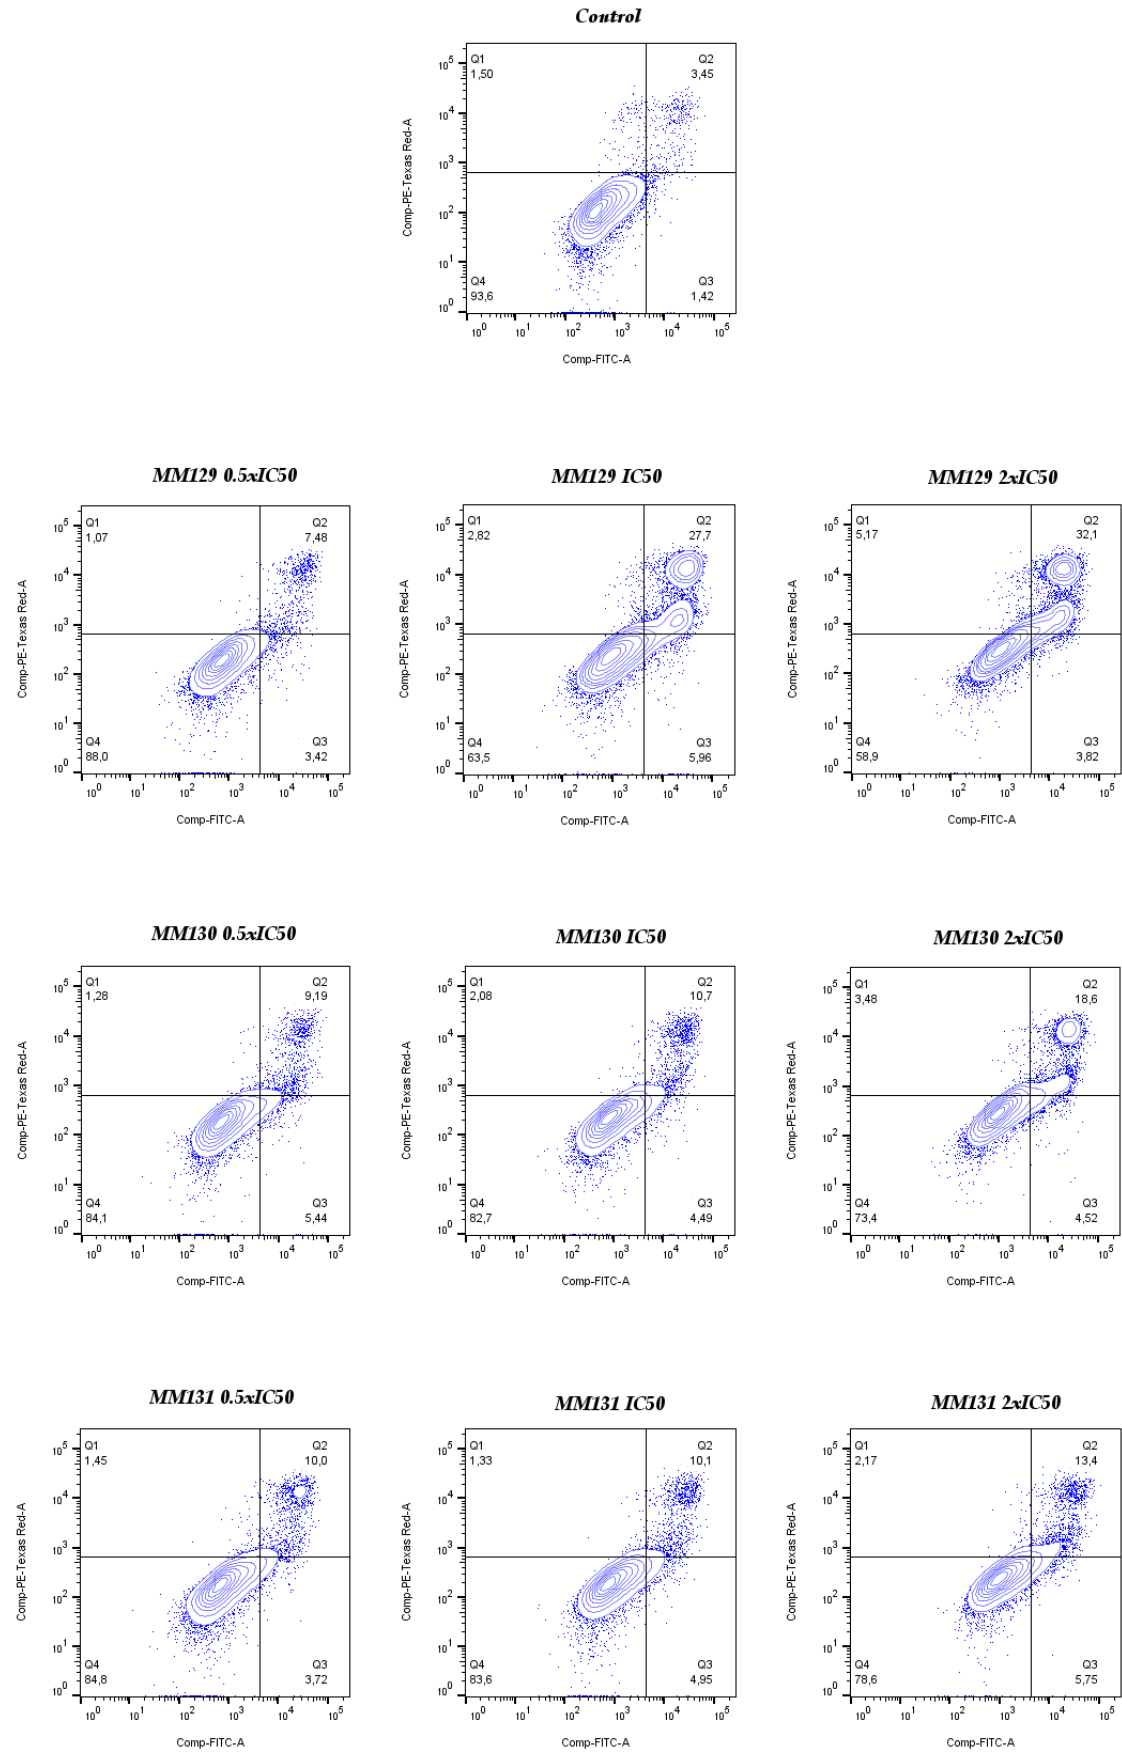

**Figure S8.** PC-3 cells after 48-h of exposure to MM-compounds.

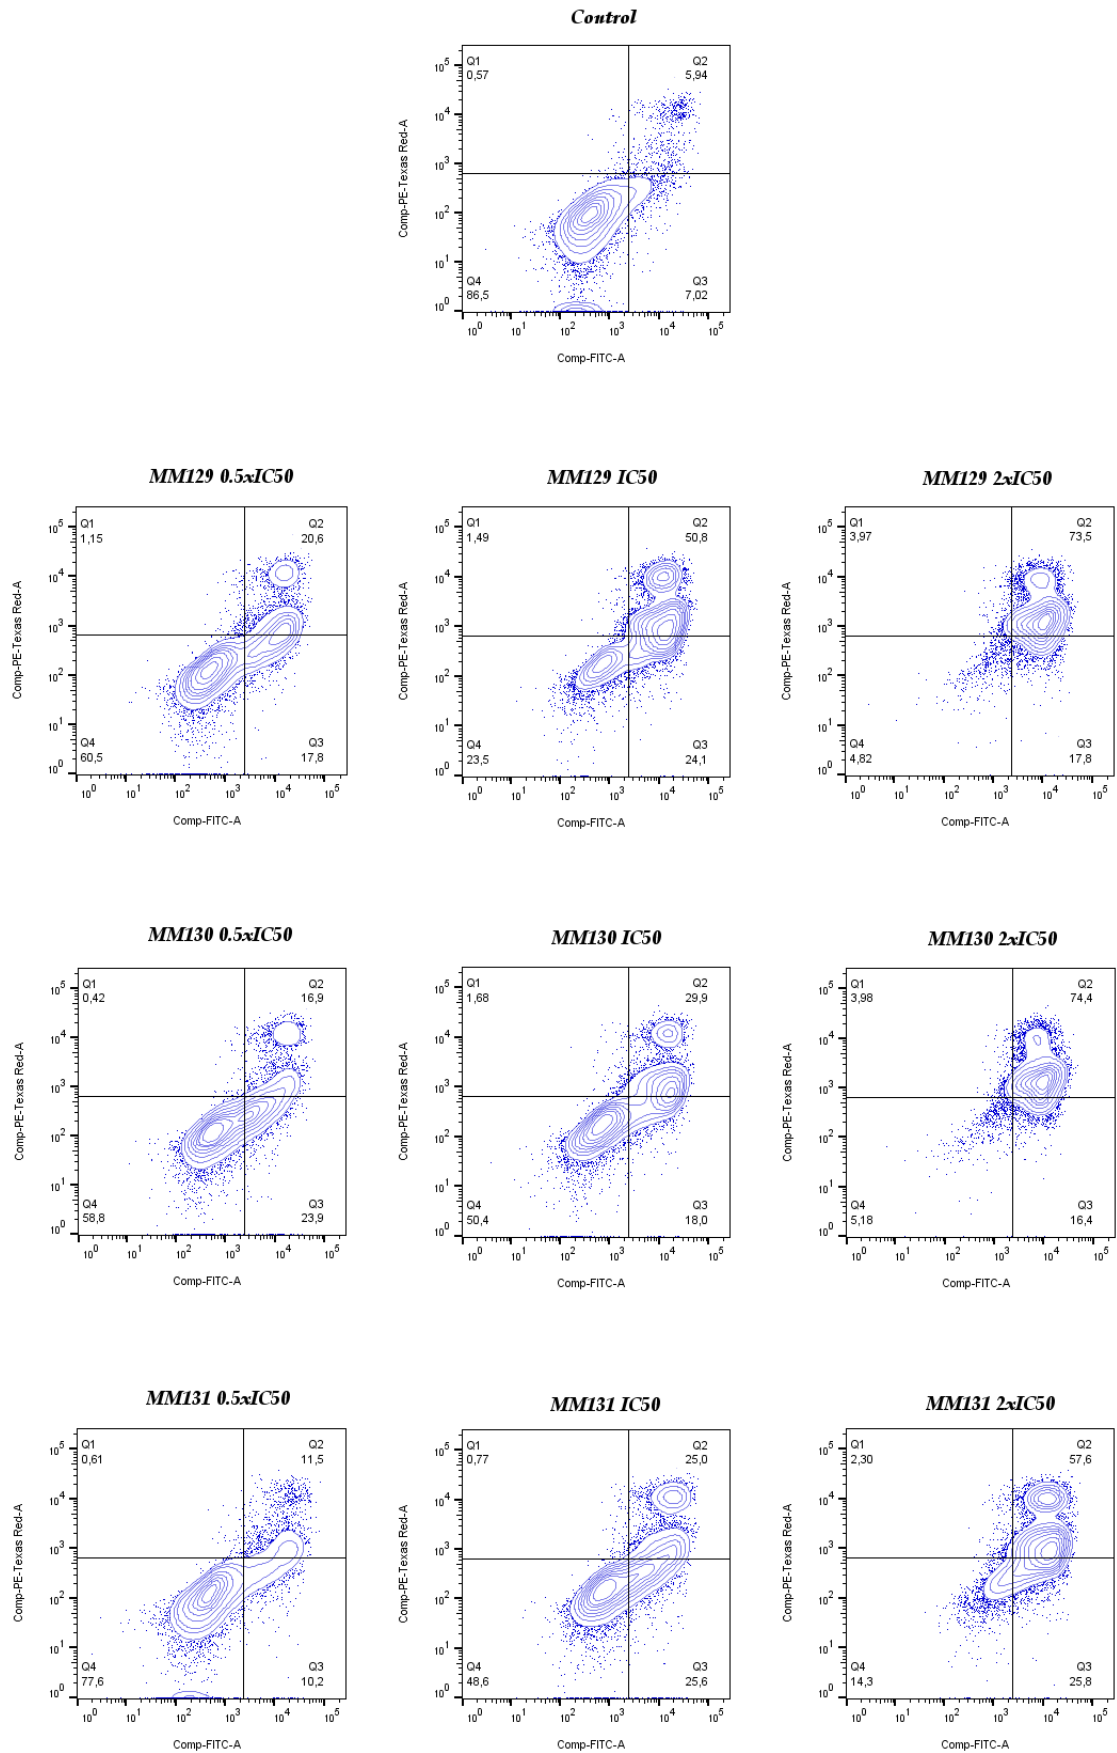

**Figure S9.** PC-3 cells after 72-h of exposure to MM-compounds.

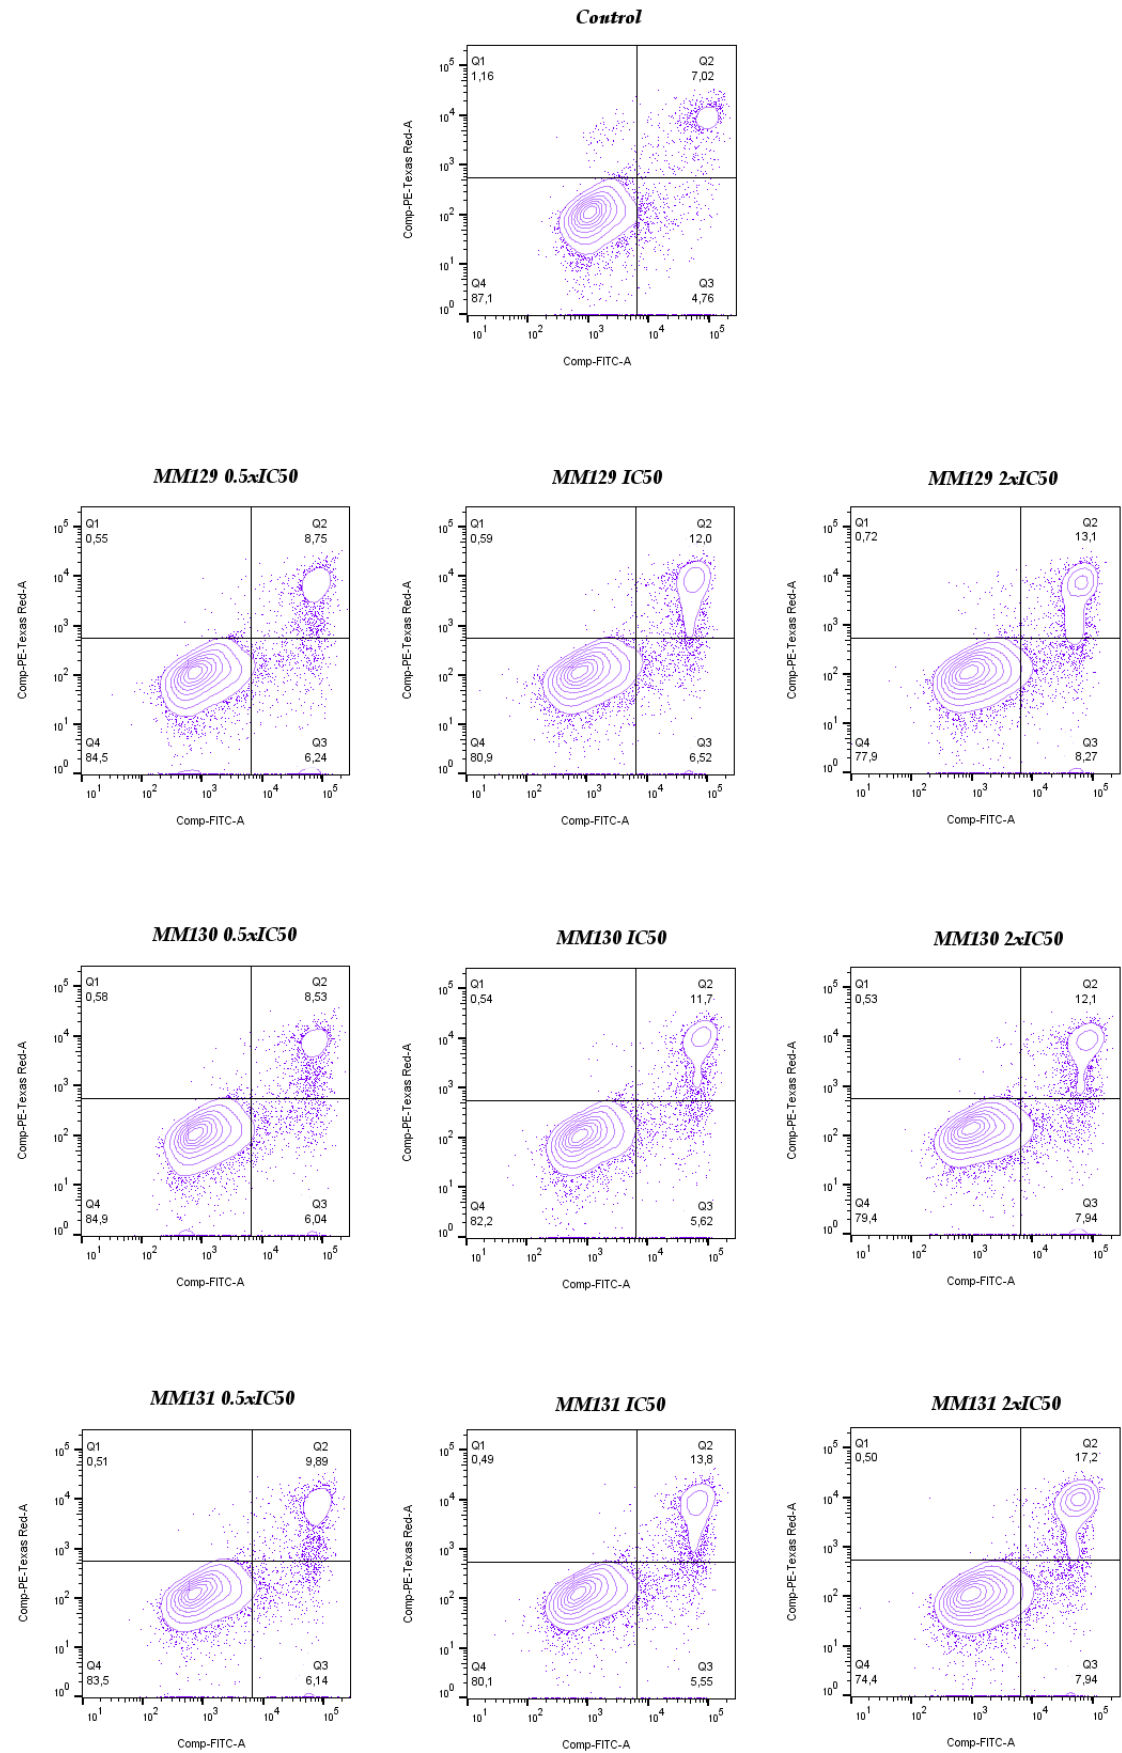

**Figure S10.** BxPC-3 cells after 24-h of exposure to MM-compounds.

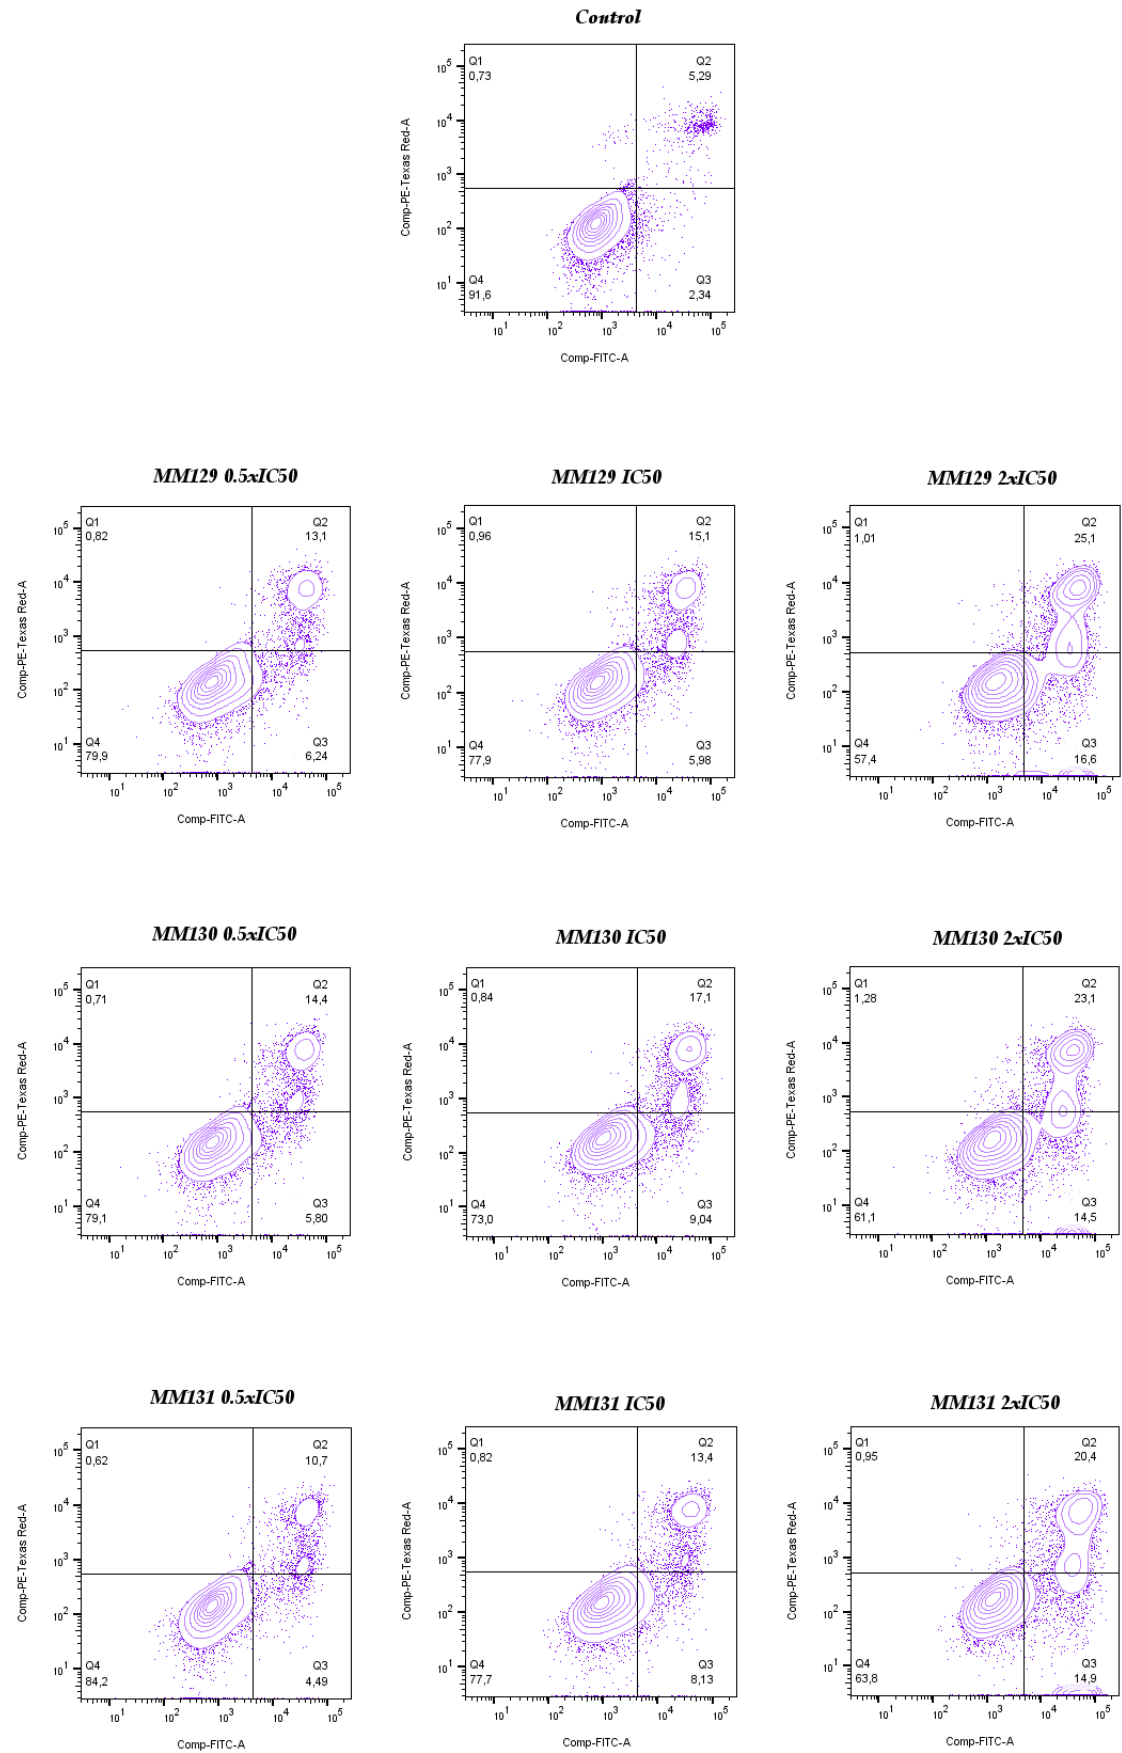

**Figure S11.** BxPC-3 cells after 48-h of exposure to MM-compounds.

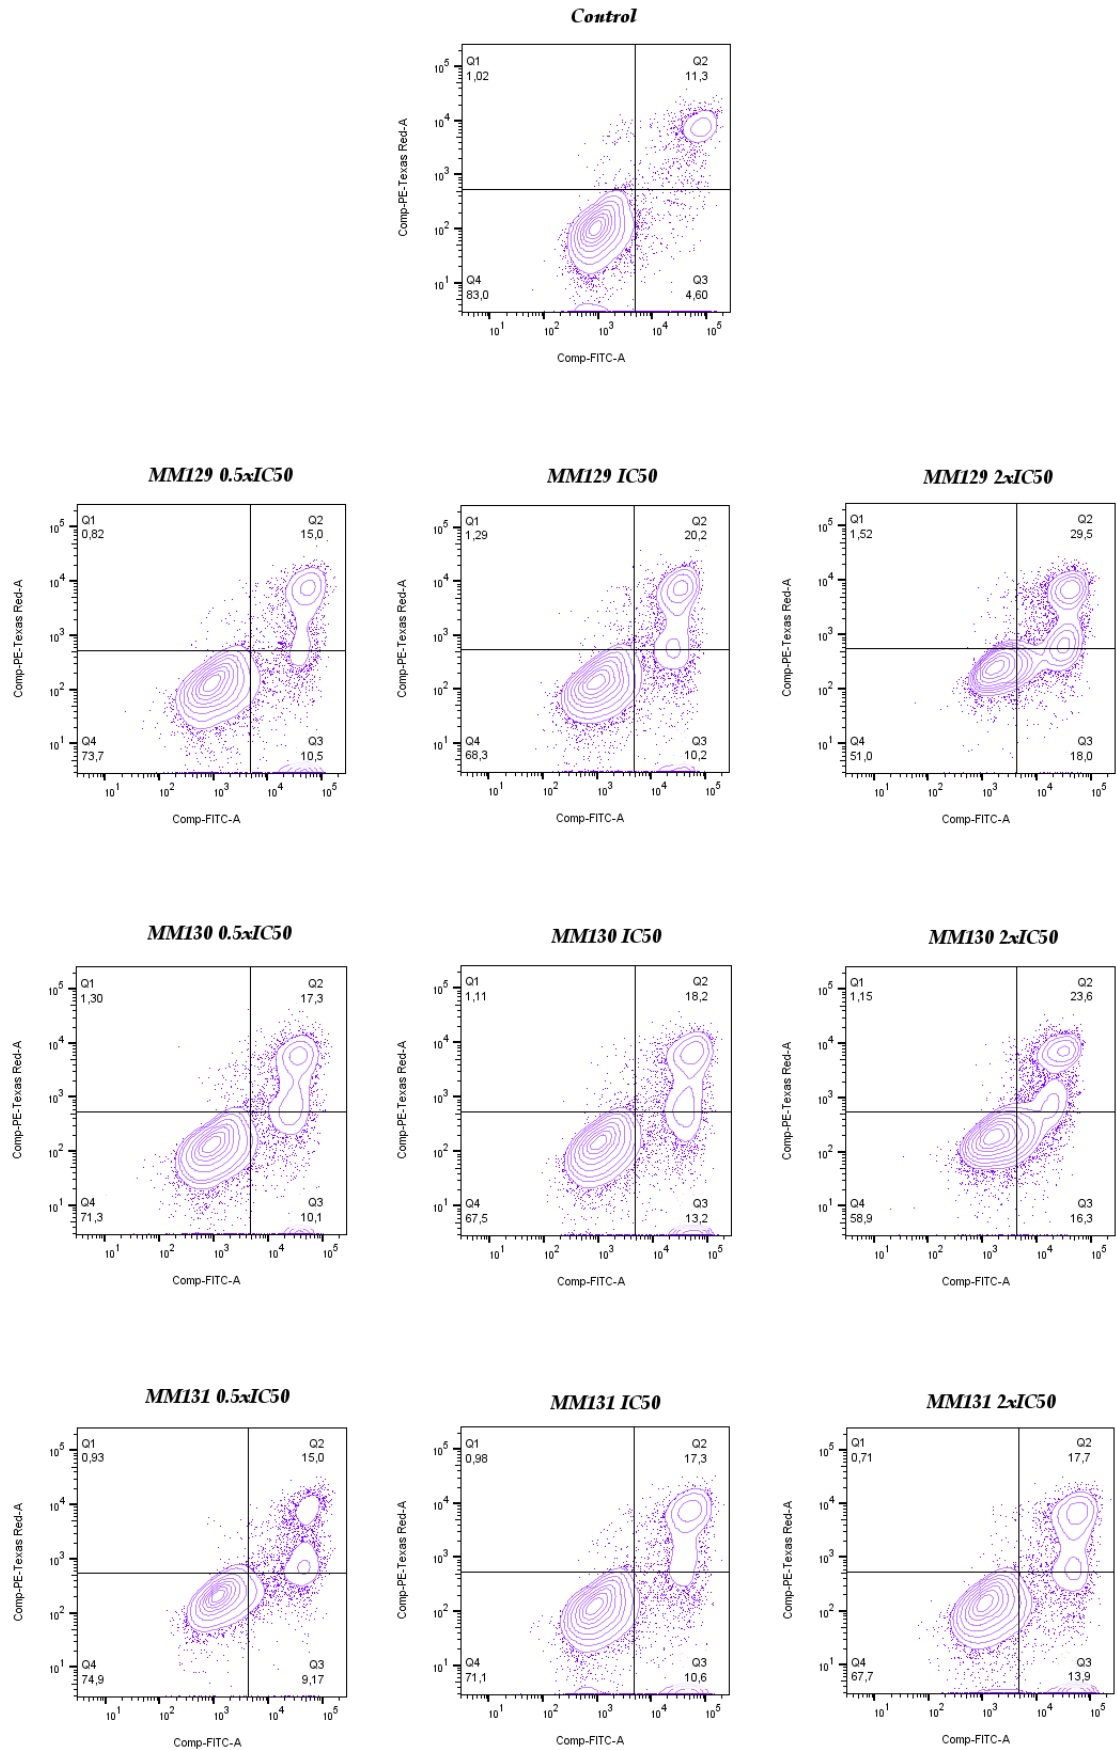

**Figure S12.** BxPC-3 cells after 72-h of exposure to MM-compounds.

## 2. Cell cycle analysis

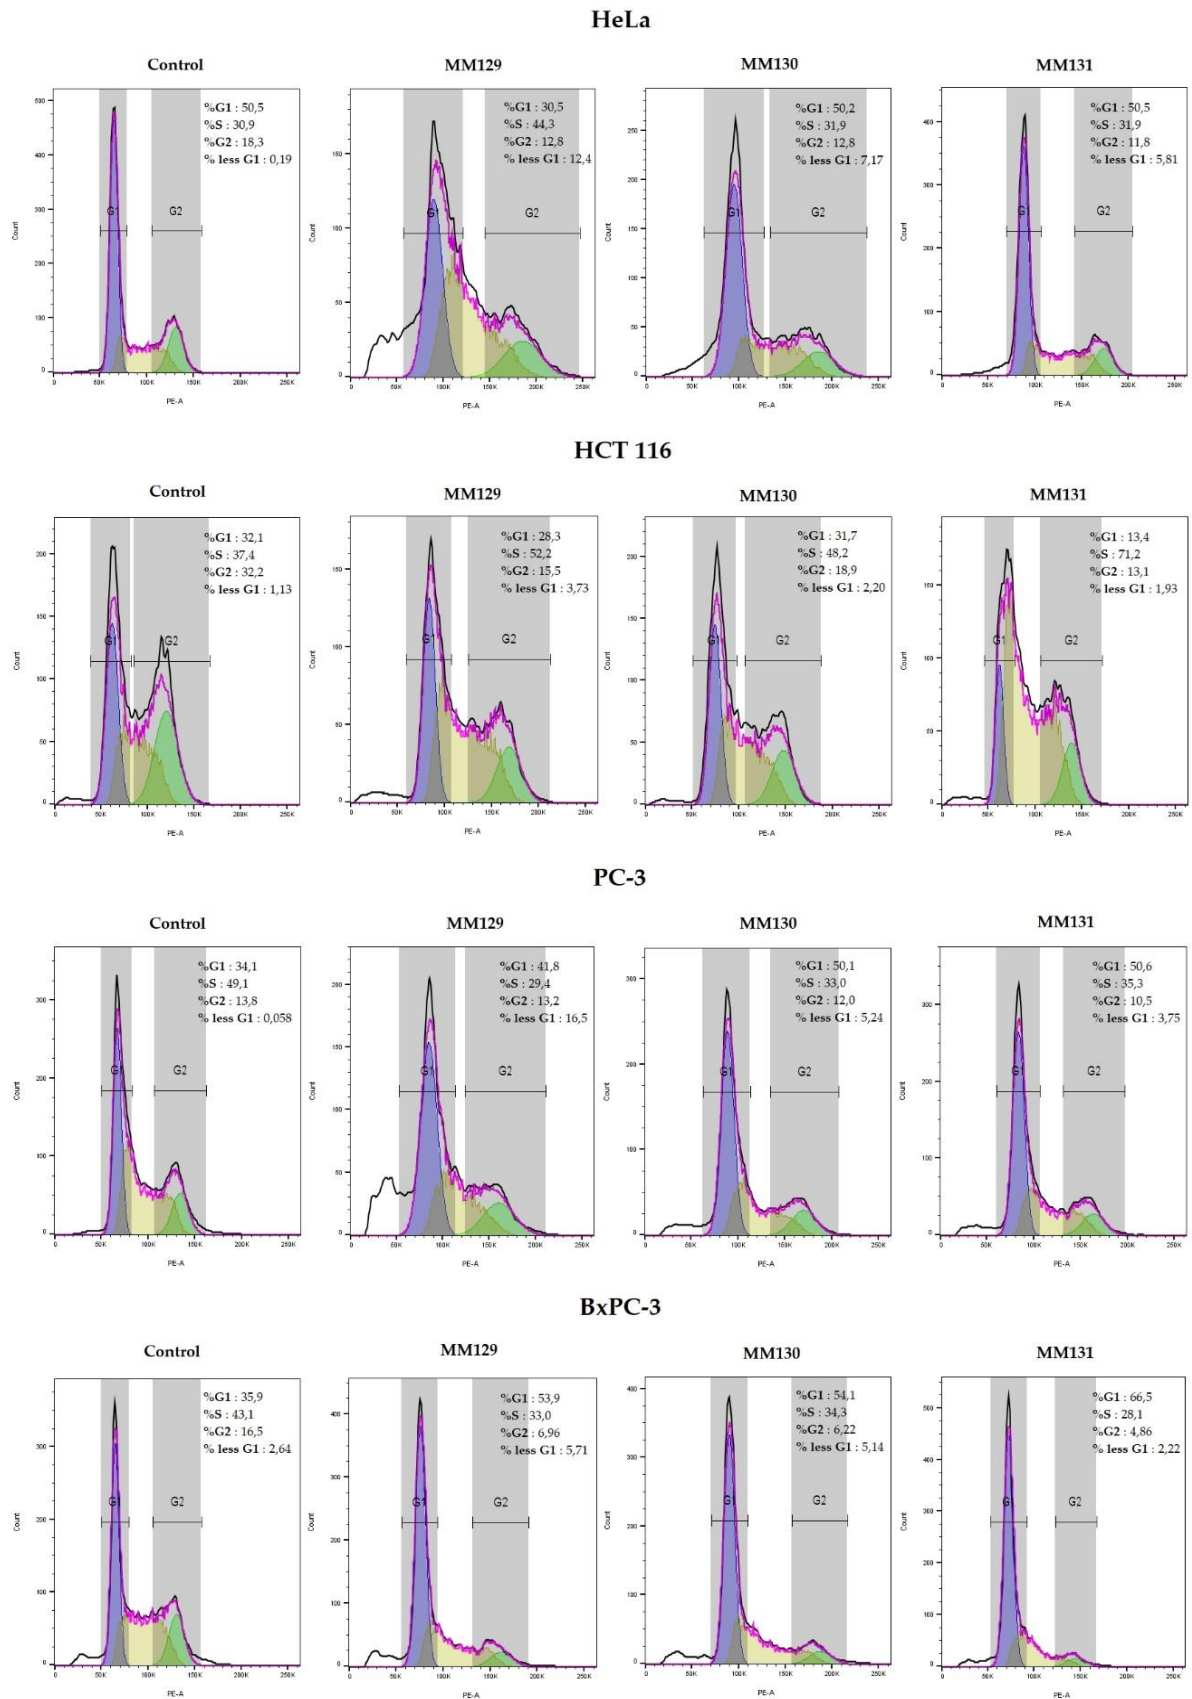

**Figure S13.** Representative dot-plots presenting the cell cycle distribution of HeLa, HCT 116, PC-3 and BxPC-3 cell lines after their 24-h incubation with **MM129**, **MM130**, and **MM131** in the concentration of IC<sub>50</sub>.

**Table S2.** Comparison of anticancer activity of **MM129**, **MM130**, and **MM131** in the concentration of IC<sub>50</sub> toward HeLa, HCT 116, PC-3, and BxPC-3 cancer cells following 24-h and/or 48-h treatment. Significant differences ( $p < 0.05$ ) compared with control (bold and \*). MM compound that exhibited the highest activity (significant differences  $p < 0.05$ ) among investigated sulfonamides in the given assay is blue color-coded.

| Method                              | Exposure time | Cell line | Control    | MM129               | MM130                 | MM131                 |
|-------------------------------------|---------------|-----------|------------|---------------------|-----------------------|-----------------------|
| Annexin V binding <sup>1</sup>      | 24-h          | HeLa      | 6.7 ± 0.7  | <b>17.4 ± 1.7 *</b> | <b>17.3 ± 2.6 *</b>   | <b>15.5 ± 1.4 *</b>   |
|                                     |               | HCT 116   | 6.9 ± 2.6  | <b>14.4 ± 2.7 *</b> | <b>16.8 ± 6.3 *</b>   | <b>14.3 ± 3.3 *</b>   |
|                                     |               | PC-3      | 9 ± 2.8    | 9 ± 3.4             | 5.9 ± 2.2             | 6.2 ± 2.7             |
|                                     |               | BxPC-3    | 13.8 ± 1.8 | 17.1 ± 1.2          | 18.1 ± 3.2            | 18.5 ± 1.3            |
|                                     | 48-h          | HeLa      | 7.1 ± 1.8  | <b>40 ± 0.82 *</b>  | <b>20.6 ± 1.7 *</b>   | <b>15.9 ± 0.66 *</b>  |
|                                     |               | HCT 116   | 10.4 ± 2.3 | <b>61 ± 1.1 *</b>   | <b>57.3 ± 3 *</b>     | <b>50.2 ± 1 *</b>     |
|                                     |               | PC-3      | 6.7 ± 1.6  | <b>23.3 ± 9 *</b>   | 14.3 ± 0.8            | 14.4 ± 1              |
|                                     |               | BxPC-3    | 12 ± 3.4   | <b>19.4 ± 3.3 *</b> | <b>24.8 ± 4.4 *</b>   | <b>21.2 ± 1.9 *</b>   |
| MitoTracker Red CMXRos <sup>2</sup> | 24-h          | HeLa      |            | 85.5 ± 7.6          | 87.6 ± 2.2            | 87.5 ± 0.9            |
|                                     |               | HCT 116   |            | <b>83.6 ± 2.8 *</b> | 88.6 ± 3.5            | 85.4 ± 1.8            |
|                                     |               | PC-3      |            | 91.7 ± 8.5          | 91.2 ± 6.7            | 92.1 ± 1.4            |
|                                     |               | BxPC-3    |            | 90.5 ± 3.1          | 87.3 ± 3.7            | 89.8 ± 7              |
|                                     | 48-h          | HeLa      |            | 86.5 ± 5.3          | 88 ± 1.3              | 86.9 ± 6.9            |
|                                     |               | HCT 116   |            | <b>80.2 ± 7.9 *</b> | <b>82.8 ± 5.2 *</b>   | 85.3 ± 2.3            |
|                                     |               | PC-3      |            | 80.2 ± 10.8         | 86.6 ± 2.1            | 83.2 ± 3.5            |
|                                     |               | BxPC-3    |            | 84.5 ± 8.1          | 87.4 ± 1.6            | 85.4 ± 8.7            |
| AO/EB dual staining <sup>1</sup>    | 48-h          | HeLa      | 1.3 ± 0.6  | <b>32 ± 6.1 *</b>   | <b>23.3 ± 2.5 *</b>   | <b>13.3 ± 1.5 *</b>   |
|                                     |               | HCT 116   | 2.3 ± 2.1  | <b>23.3 ± 5.5 *</b> | <b>14.3 ± 4.5 *</b>   | <b>21 ± 7.2 *</b>     |
|                                     |               | PC-3      | 6 ± 2      | 8.7 ± 1.5           | 11.7 ± 1.5            | 7 ± 3                 |
|                                     |               | BxPC-3    | 3 ± 2      | <b>16.3 ± 3.5 *</b> | <b>13 ± 2.6 *</b>     | <b>14.7 ± 2.3 *</b>   |
| Cell cycle <sup>3</sup>             | 24-h          | HeLa      |            | ↑ subG1; ↓ G0/G1    | —                     | —                     |
|                                     |               | HCT 116   |            | ↑ S; ↓ G2/M         | ↑ S; ↓ G2/M           | ↑ S; ↓ G2/M; ↓ G0/G1  |
|                                     |               | PC-3      |            | ↑ subG1; ↓ S;       | ↑ subG1; ↓ S; ↑ G0/G1 | ↑ subG1; ↓ S; ↑ G0/G1 |
|                                     |               | BxPC-3    |            | ↑ G0/G1; ↓ G2/M     | ↑ G0/G1; ↓ G2/M       | ↑ G0/G1; ↓ G2/M       |

<sup>1</sup> Percentage of apoptotic cells shown as the mean ± SD.

<sup>2</sup> Changes in  $\Delta\Psi_m$  presented as a mean ± SD relative to the control group normalized to 100%.

<sup>3</sup> A significant ( $p < 0.05$ ) increase (↑) or decrease (↓) in the percentage of cells in a particular cell cycle phase.

#### References:

1. Bukowski, K.; Marciniak, B.; Kciuk, M.; Mojzych, M.; Kontek, R. Pyrazolo[4,3-e]Tetrazolo[1,5-b][1,2,4]Triazine Sulfonamides as Novel Potential Anticancer Agents: Cytotoxic and Genotoxic Activities In Vitro. *Molecules* **2022**, *27*, 3761, doi:10.3390/molecules27123761.
